# Supplementary material
Source: Research Square preprint supplement (doi:10.21203/rs.3.rs-8258528/v1)
Supplement: Supplementary file 1 [file 1b46ab2bc26e18e390e03657.xlsx]

## Sheet: Sheet 1
sample_name	species	year	virus	Genbank Accession Number
CORONA RED FOX MO 3747 2022	RED FOX	2022	Canine Coronavirus	PX861929
CORONA ROE DEER MO 1032 2022	ROE DEER	2022	Embecovirus sp. 1	PX861930
CORONA ROE DEER MO 331 2022	ROE DEER	2022	Betacoronavirus erinacei	PX861931
CORONA ROE DEER MO 571 2022	ROE DEER	2022	Betacoronavirus erinacei	PX861932
CORONA ROE DEER MO 93 2022	ROE DEER	2022	Betacoronavirus erinacei	PX861933
CORONA PORCUPINE MO 557 2022	PORCUPINE	2022	Embecovirus sp. 1	PX861934
CORONA HARE MO 495 2022	HARE	2022	Betacoronavirus erinacei	PX861935
CORONA HEDGEHOG MO 2004 2022	HEDGEHOG	2022	Betacoronavirus erinacei	PX861936
CORONA HEDGEHOG MO 201 2022	HEDGEHOG	2022	Betacoronavirus erinacei	PX861937
CORONA HEDGEHOG 242131-1 2022	HEDGEHOG	2022	Betacoronavirus erinacei	PX861938
CORONA HEDGEHOG 242131-3 2022	HEDGEHOG	2022	Betacoronavirus erinacei	PX861939
CORONA HEDGEHOG MO 1720 2022	HEDGEHOG	2022	Betacoronavirus erinacei	PX861940
CORONA HEDGEHOG 282796-2 2022	HEDGEHOG	2022	Betacoronavirus erinacei	PX861941
CORONA HEDGEHOG MO 453 2022	HEDGEHOG	2022	Betacoronavirus erinacei	PX861942
CORONA HEDGEHOG MO 535 2022	HEDGEHOG	2022	Betacoronavirus erinacei	PX861943
CORONA HEDGEHOG MO 646 2022	HEDGEHOG	2022	Betacoronavirus erinacei	PX861944
CORONA HEDGEHOG 334750-2 2022	HEDGEHOG	2022	Betacoronavirus erinacei	PX861945
CORONA HEDGEHOG MO 3561 2022	HEDGEHOG	2022	Betacoronavirus erinacei	PX861946
CORONA HEDGEHOG MO 3137 2022	HEDGEHOG	2022	Betacoronavirus erinacei	PX861947
CORONA HEDGEHOG 291714-2 2022	HEDGEHOG	2022	Betacoronavirus erinacei	PX861948
CORONA HEDGEHOG MO 2762 2022	HEDGEHOG	2022	Betacoronavirus erinacei	PX861949
CORONA HEDGEHOG 333110 2022	HEDGEHOG	2022	Betacoronavirus erinacei	PX861950
CORONA HEDGEHOG 351329 2022	HEDGEHOG	2022	Betacoronavirus erinacei	PX861951
CORONA HEDGEHOG 291714-4 2022	HEDGEHOG	2022	Betacoronavirus erinacei	PX861952
CORONA HEDGEHOG MO 471 2022	HEDGEHOG	2022	Betacoronavirus erinacei	PX861953
CORONA RED FOX MO 96 2022	RED FOX	2022	Betacoronavirus erinacei	PX861954
CORONA RED FOX MO 101 2022	RED FOX	2022	Betacoronavirus erinacei	PX861955
CORONA HEDGEHOG MO 652 2022	HEDGEHOG	2022	Betacoronavirus erinacei	PX861956
CORONA HEDGEHOG 4559-5 2023	HEDGEHOG	2023	Betacoronavirus erinacei	PX861957
CORONA ROE DEER 13868 2023	ROE DEER	2023	Embecovirus sp. 1	PX861958
CORONA WOLF MO 704 2023	WOLF	2023	Canine Coronavirus	PX861959
CORONA WOLF 51891 2023	WOLF	2023	Canine Coronavirus	PX861960
CORONA HEDGEHOG MO 2720 2023	HEDGEHOG	2023	Betacoronavirus erinacei	PX861961
CORONA HEDGEHOG MO 2488 2023	HEDGEHOG	2023	Betacoronavirus erinacei	PX861962
CORONA HEDGEHOG 177864-4 2023	HEDGEHOG	2023	Betacoronavirus erinacei	PX861963
CORONA HEDGEHOG 177864-2 2023	HEDGEHOG	2023	Betacoronavirus erinacei	PX861964
CORONA HEDGEHOG 182249 2023	HEDGEHOG	2023	Betacoronavirus erinacei	PX861965
CORONA HEDGEHOG MO 2199 2023	HEDGEHOG	2023	Betacoronavirus erinacei	PX861966
CORONA HEDGEHOG MO 2120 2023	HEDGEHOG	2023	Betacoronavirus erinacei	PX861967
CORONA HEDGEHOG 94524-2 2023	HEDGEHOG	2023	Betacoronavirus erinacei	PX861968
CORONA PORCUPINE 104243 2023	PORCUPINE	2023	Betacoronavirus erinacei	PX861969
CORONA HEDGEHOG 135058 2023	HEDGEHOG	2023	Betacoronavirus erinacei	PX861970
CORONA WOLF MO 1949 2023	WOLF	2023	Canine Coronavirus	PX861971
CORONA HEDGEHOG MO 1996 2023	HEDGEHOG	2023	Betacoronavirus erinacei	PX861972
CORONA HEDGEHOG MO 2023 2023	HEDGEHOG	2023	Betacoronavirus erinacei	PX861973
CORONA HEDGEHOG MO 2026 2023	HEDGEHOG	2023	Betacoronavirus erinacei	PX861974
CORONA HEDGEHOG MO 2032 2023	HEDGEHOG	2023	Betacoronavirus erinacei	PX861975
CORONA HEDGEHOG MO 2064 2023	HEDGEHOG	2023	Betacoronavirus erinacei	PX861976
CORONA HEDGEHOG MO 3401 2023	HEDGEHOG	2023	Betacoronavirus erinacei	PX861977
CORONA HEDGEHOG MO 2902 2023	HEDGEHOG	2023	Betacoronavirus erinacei	PX861978
CORONA HEDGEHOG 224538-1 2023	HEDGEHOG	2023	Betacoronavirus erinacei	PX861979
CORONA HEDGEHOG 227769-1 2023	HEDGEHOG	2023	Betacoronavirus erinacei	PX861980
CORONA HEDGEHOG MO 4874 2023	HEDGEHOG	2023	Betacoronavirus erinacei	PX861981
CORONA HEDGEHOG MO 4679 2023	HEDGEHOG	2023	Betacoronavirus erinacei	PX861982
CORONA HEDGEHOG MO 4676 2023	HEDGEHOG	2023	Betacoronavirus erinacei	PX861983
CORONA HEDGEHOG MO 4668 2023	HEDGEHOG	2023	Betacoronavirus erinacei	PX861984
CORONA WOLF MO 4649 2023	WOLF	2023	Canine Coronavirus	PX861985
CORONA HEDGEHOG MO 4644 2023	HEDGEHOG	2023	Betacoronavirus erinacei	PX861986
CORONA HEDGEHOG MO 4638 2023	HEDGEHOG	2023	Betacoronavirus erinacei	PX861987
CORONA ROE DEER 395523 2023	ROE DEER	2023	Embecovirus sp. 2	PX861988
CORONA HEDGEHOG MO 4507 2023	HEDGEHOG	2023	Betacoronavirus erinacei	PX861989
CORONA HEDGEHOG MO 4544 2023	HEDGEHOG	2023	Betacoronavirus erinacei	PX861990
CORONA HEDGEHOG MO 4498 2023	HEDGEHOG	2023	Betacoronavirus erinacei	PX861991
CORONA HEDGEHOG MO 4492 2023	HEDGEHOG	2023	Betacoronavirus erinacei	PX861992
CORONA HEDGEHOG MO 4436 2023	HEDGEHOG	2023	Betacoronavirus erinacei	PX861993
CORONA HEDGEHOG MO 4213 2023	HEDGEHOG	2023	Betacoronavirus erinacei	PX861994
CORONA HEDGEHOG MO 4169 2023	HEDGEHOG	2023	Betacoronavirus erinacei	PX861995
CORONA HEDGEHOG MO 4102 2023	HEDGEHOG	2023	Betacoronavirus erinacei	PX861996
CORONA HEDGEHOG MO 4096 2023	HEDGEHOG	2023	Betacoronavirus erinacei	PX861997
CORONA HEDGEHOG MO 4082 2023	HEDGEHOG	2023	Betacoronavirus erinacei	PX861998
CORONA HEDGEHOG MO 4076 2023	HEDGEHOG	2023	Betacoronavirus erinacei	PX861999
CORONA HEDGEHOG MO 4045 2023	HEDGEHOG	2023	Betacoronavirus erinacei	PX862000
CORONA HEDGEHOG MO 4036 2023	HEDGEHOG	2023	Betacoronavirus erinacei	PX862001
CORONA HEDGEHOG MO 4030 2023	HEDGEHOG	2023	Betacoronavirus erinacei	PX862002
CORONA HEDGEHOG MO 4021 2023	HEDGEHOG	2023	Betacoronavirus erinacei	PX862003
CORONA HEDGEHOG MO 3944 2023	HEDGEHOG	2023	Betacoronavirus erinacei	PX862004
CORONA HEDGEHOG 302995-4 2023	HEDGEHOG	2023	Betacoronavirus erinacei	PX862005
CORONA HEDGEHOG 57204-2 2024	HEDGEHOG	2024	Betacoronavirus erinacei	PX862006
CORONA HEDGEHOG 57204-3 2024	HEDGEHOG	2024	Betacoronavirus erinacei	PX862007
CORONA HEDGEHOG 57204-4 2024	HEDGEHOG	2024	Betacoronavirus erinacei	PX862008
CORONA HEDGEHOG MO 4954 2024	HEDGEHOG	2024	Betacoronavirus erinacei	PX862009
CORONA HEDGEHOG MO 5211 2024	HEDGEHOG	2024	Betacoronavirus erinacei	PX862010
CORONA HARE MO 5394 2024	HARE	2024	Betacoronavirus erinacei	PX862011
CORONA WOLF MO 5467 2024	WOLF	2024	Canine Coronavirus	PX862012
CORONA HEDGEHOG MO 5585 2024	HEDGEHOG	2024	Betacoronavirus erinacei	PX862013
CORONA HEDGEHOG MO 5597 2024	HEDGEHOG	2024	Betacoronavirus erinacei	PX862014
CORONA WOLF MO 5492 2024	WOLF	2024	Canine Coronavirus	PX862015
CORONA HEDGEHOG 177864-1 2023	HEDGEHOG	2023	Betacoronavirus erinacei	PX862016
CORONA HEDGEHOG 244480-2 2023	HEDGEHOG	2023	Betacoronavirus erinacei	PX862017
CORONA HEDGEHOG 244480-1 2023	HEDGEHOG	2023	Betacoronavirus erinacei	PX862018
