# Supplementary material
Source: Research Square preprint supplement (doi:10.21203/rs.3.rs-8258528/v1)
Supplement: Supplementary file 2 [file d36938e2a329e123ab922463.xlsx]

## Sheet: Sheet 1
species	sample_size	Minimum detectable prevalence (%)
RED FOX	678	0.44
ROE DEER	362	0.82
WESTERN EUROPEAN HEDGEHOG	382	0.78
EUROPEAN BADGER	205	1.45
CRESTED PORCUPINE	152	1.95
EUROPEAN HARE	103	2.87
GREY WOLF	116	2.55
FALLOW DEER	50	5.82
RAT	44	6.58
STONE MARTEN	31	9.21
RED SQUIRREL	26	10.88
EDIBLE DORMOUSE	18	15.33
RED DEER	18	15.33
HOUSE MOUSE	11	23.84
GOLDEN JACKAL	4	52.71
COYPU	5	45.07
EUROPEAN WILD RABBIT	5	45.07
COMMON BOTTLENOSE DOLPHIN	4	52.71
MEERKAT	3	63.16
WESTERN POLECAT	3	63.16
FERRET	2	77.64
EASTERN COTTONTAIL	2	77.64
EUROPEAN MOLE	2	77.64
PINE MARTEN	2	77.64
RACCOON	2	77.64
AZARA'S AGOUTI	1	95
SAVI'S PIPISTRELLE	1	95
CARACAL	1	95
CHINCHILLA	1	95
EURASIAN OTTER	1	95
STRIPED DOLPHIN	1	95
RED-NECKED WALLABY	1	95
LEAST WEASEL	1	95
Total	2238	0.13
